# Supplementary material for: Enhanced visible photoluminescence in ultrathin poly(3-hexylthiophene) films by incorporation of Au nanoparticles
Source: Royal Society of Chemistry journal article supplement (doi:10.1039/b416107f), 2005-01-01
Supplement: b416107f.pdf [file b416107f.pdf]

## Supporting Information

### Enhanced visible photoluminescence in ultrathin poly(3-hexylthiophene) films by incorporation of Au nanoparticles

Patrick G. Nicholson, Virginia Ruiz, Julie V. Macpherson, Patrick R. Unwin

Department of Chemistry, University of Warwick, Coventry, UK, CV4 7AL

Fax: + 44 24 7652 4112. Tel.: + 44 24 7652 3264.

E-mail: j.macpherson@warwick.ac.uk, p.r.unwin@warwick.ac.uk

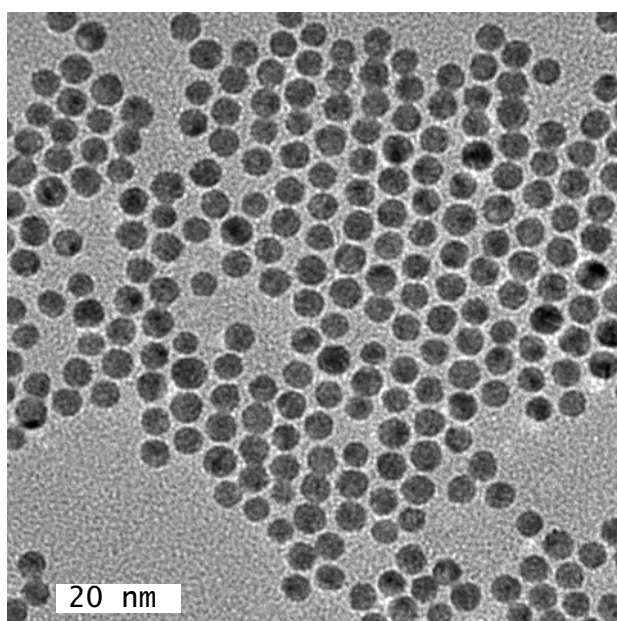

**Fig. S1** TEM image of the Au NPs drop cast from chloroform solutions on a carbon-coated copper grid. Core diameter was  $5.4 \pm 0.3$  nm.
